# Supplementary material for: A circadian rhythm-related biomarker for predicting prognosis and immunotherapy efficacy in lung adenocarcinoma
Source: publisher site journal article supplement (doi:10.18632/aging.204411), 2022-12-01
Supplement: Supplementary file [file aging-v14i23-204411-supplementary-material-SD1.pdf]

**SUPPLEMENTARY FIGURE**

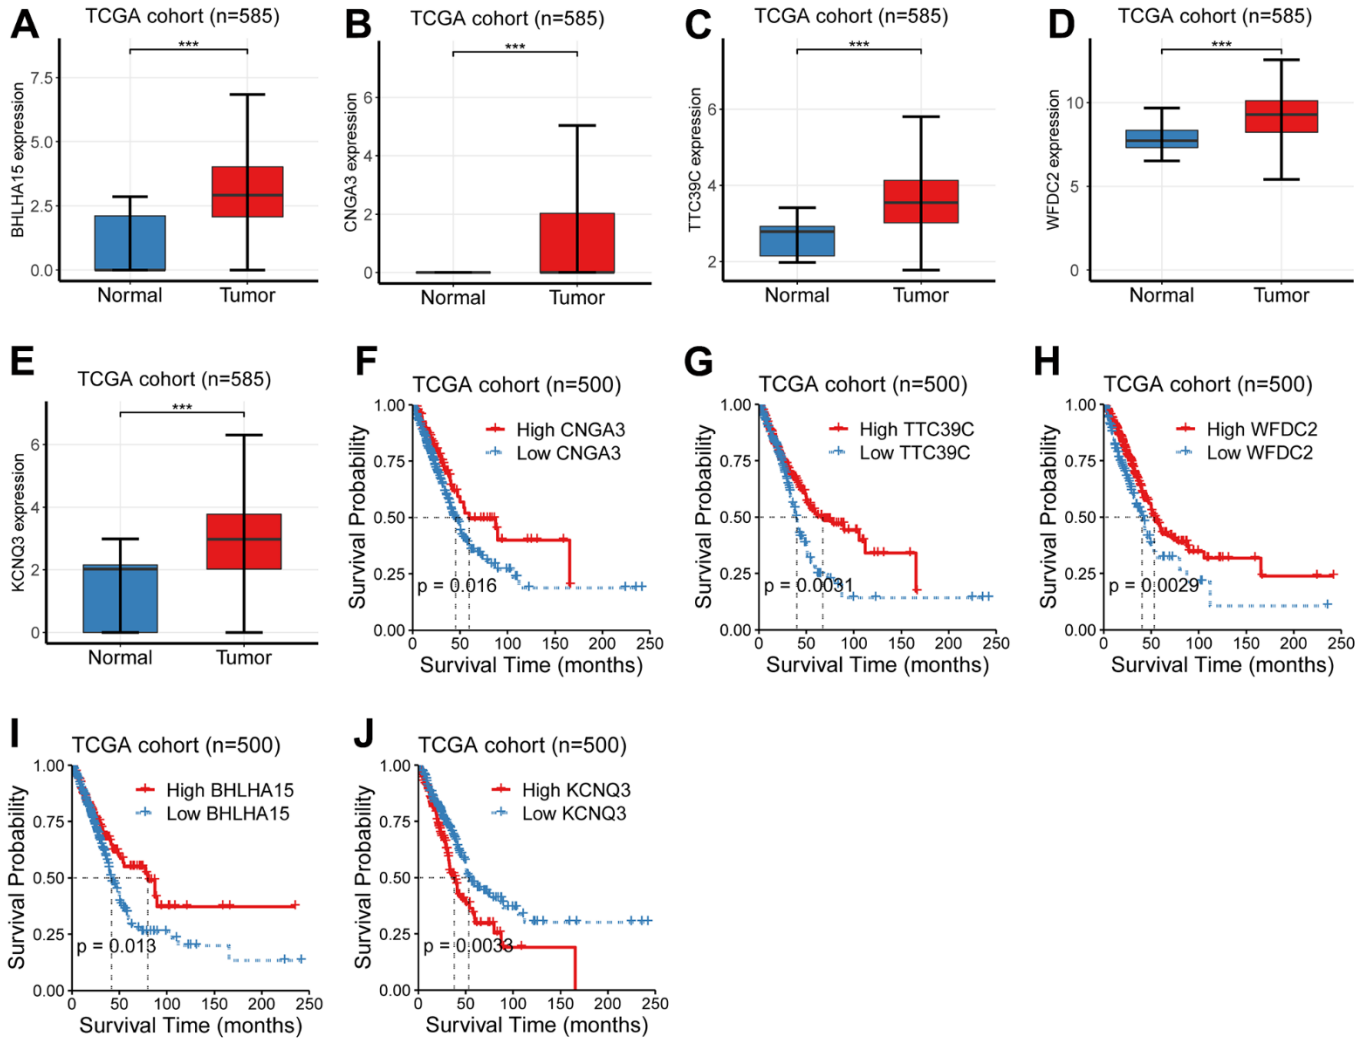

**Supplementary Figure 1. Investigation of the candidate CR-related genes in LUAD. (A–E)** Box plots that display the gene expression levels of the CR-related genes. **(F–J)** Kaplan-Meier curve that demonstrate the survival difference between the low- and high-group.
